# Supplementary material for: Spermine oxidase promotes bile canalicular lumen formation through acrolein production
Source: PubMed Central journal article supplement (PMC5665972; doi:10.1038/s41598-017-14929-1), 2017-11-01
Supplement: 41598_2017_14929_MOESM1_ESM.pdf [file 41598_2017_14929_MOESM1_ESM.pdf]

Supplementary Figures

Manuscript title: Spermine oxidase promotes bile canalicular lumen formation through acrolein production

Author list:

Takeshi Uemura<sup>1,2\*</sup>, Tomokazu Takasaka<sup>2</sup>, Kazuei Igarashi<sup>1,3</sup> and Hiroshi Ikegaya<sup>2</sup>

<sup>1</sup>Amine Pharma Research Institute, 1-8-15 Inohana, Chuo-ku, Chiba 260-0856, Japan

<sup>2</sup>Department of Forensic Medicine, Graduate School of Medical Science, Kyoto Prefectural University of Medicine, 465 Kajii-cho, Kawaramachi-Hirokoji, Kamigyo-ku, Kyoto 602-8566, Japan

<sup>3</sup>Graduate School of Pharmaceutical Sciences, Chiba University, 1-8-1 Inohana Chuo-ku, Chiba 260-0856, Japan

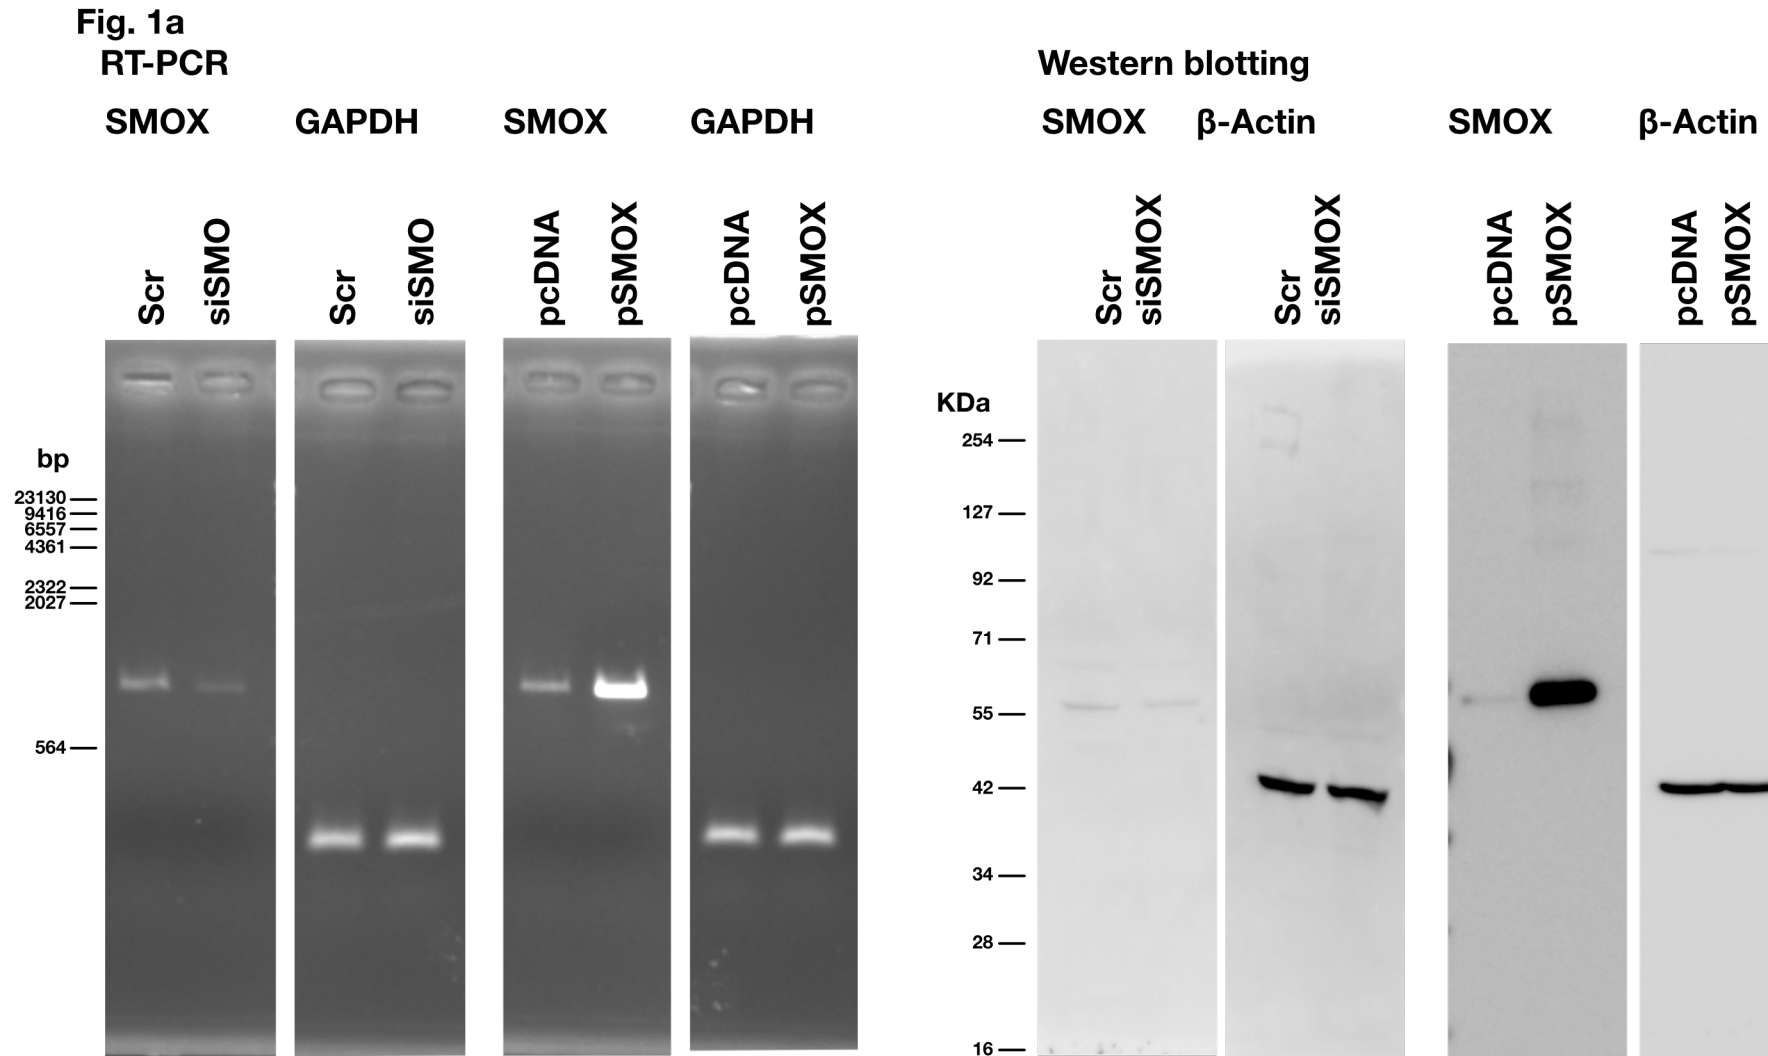

**Supplementary Figure S1.** Full-length blots/gels for Fig. 1a are presented. The levels of SMOX mRNA and protein were determined by semi-quantitative PCR and western blotting as described in Materials and methods section. GAPDH and  $\beta$ -actin were used for loading control.

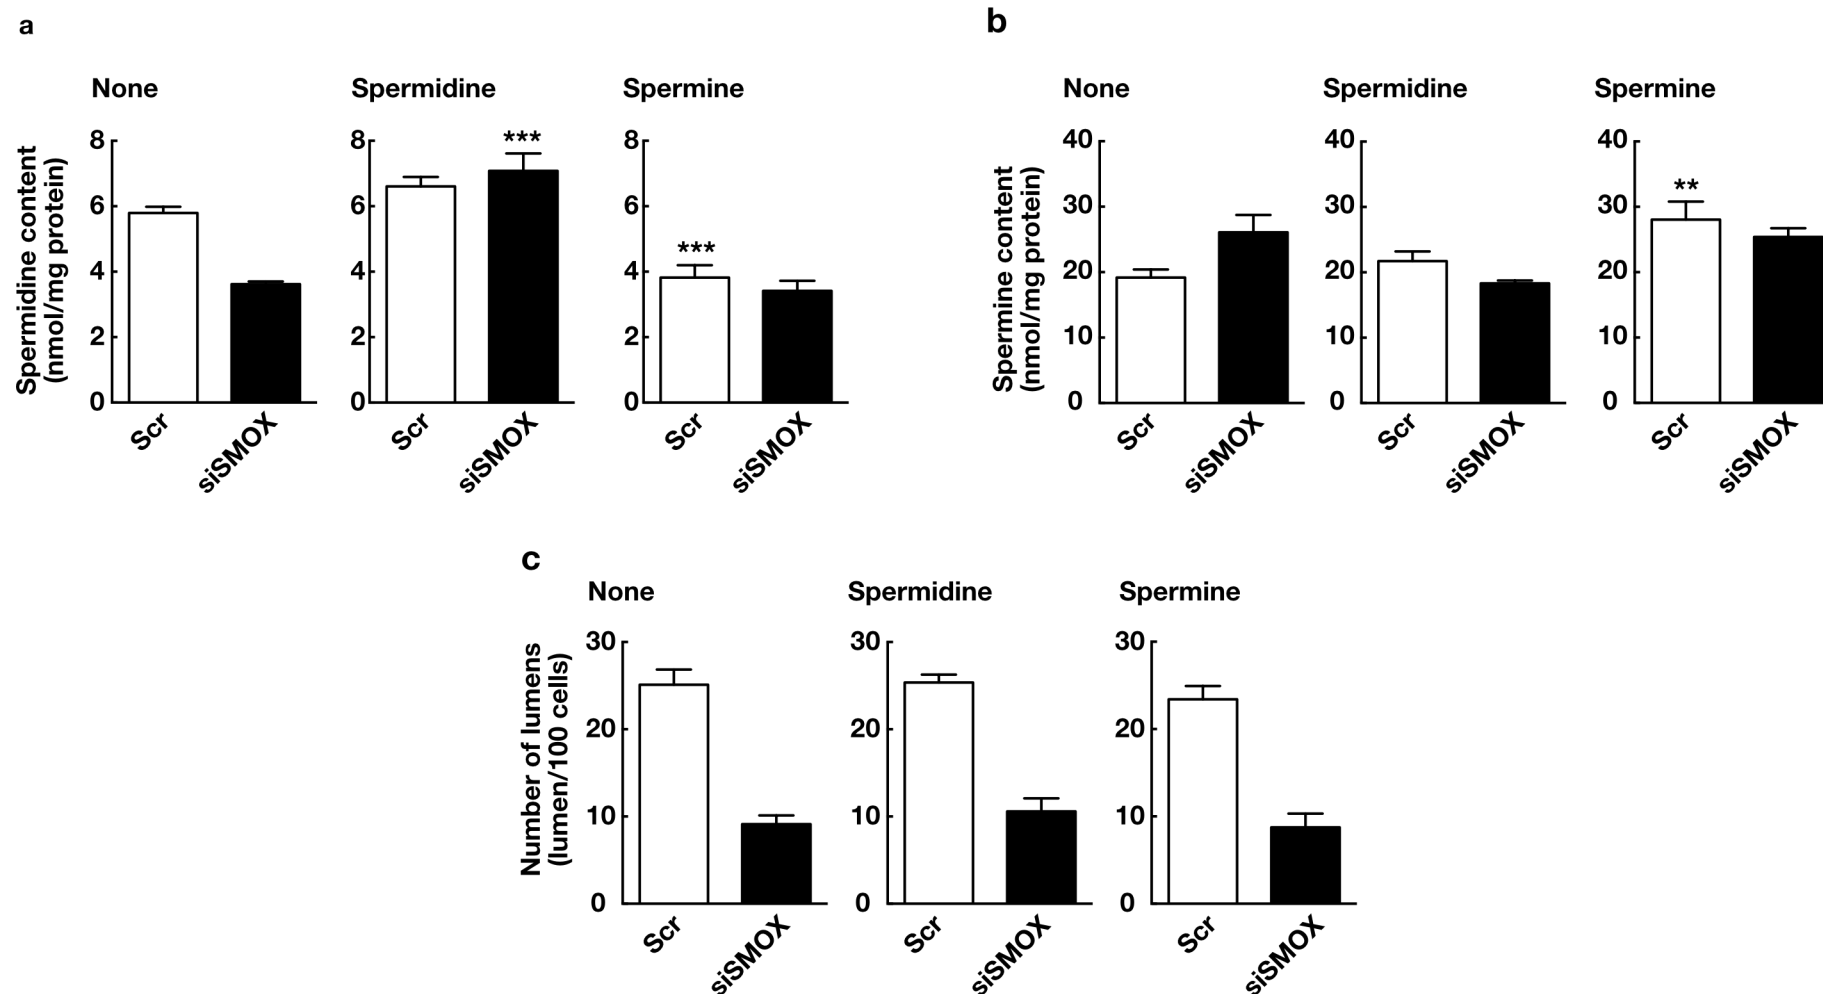

**Supplementary Figure S2.** Spermidine (a) and spermine (b) contents in cells transfected with Scr (open column) or siSMOX (filled column) RNAs cultured with 10  $\mu$ M each of spermidine or spermine were measured as described in Materials and Method and expressed as nmol/mg protein. (c) The numbers of bile canalicular lumen in cells 3 days after transfection with Scr (open column) or siSMOX (filled column) RNAs cultured with 10  $\mu$ M each of spermidine or spermine were counted and expressed as the number of lumen per 100 cells. \*\*,  $p < 0.01$ , \*\*\*,  $p < 0.005$  against None.

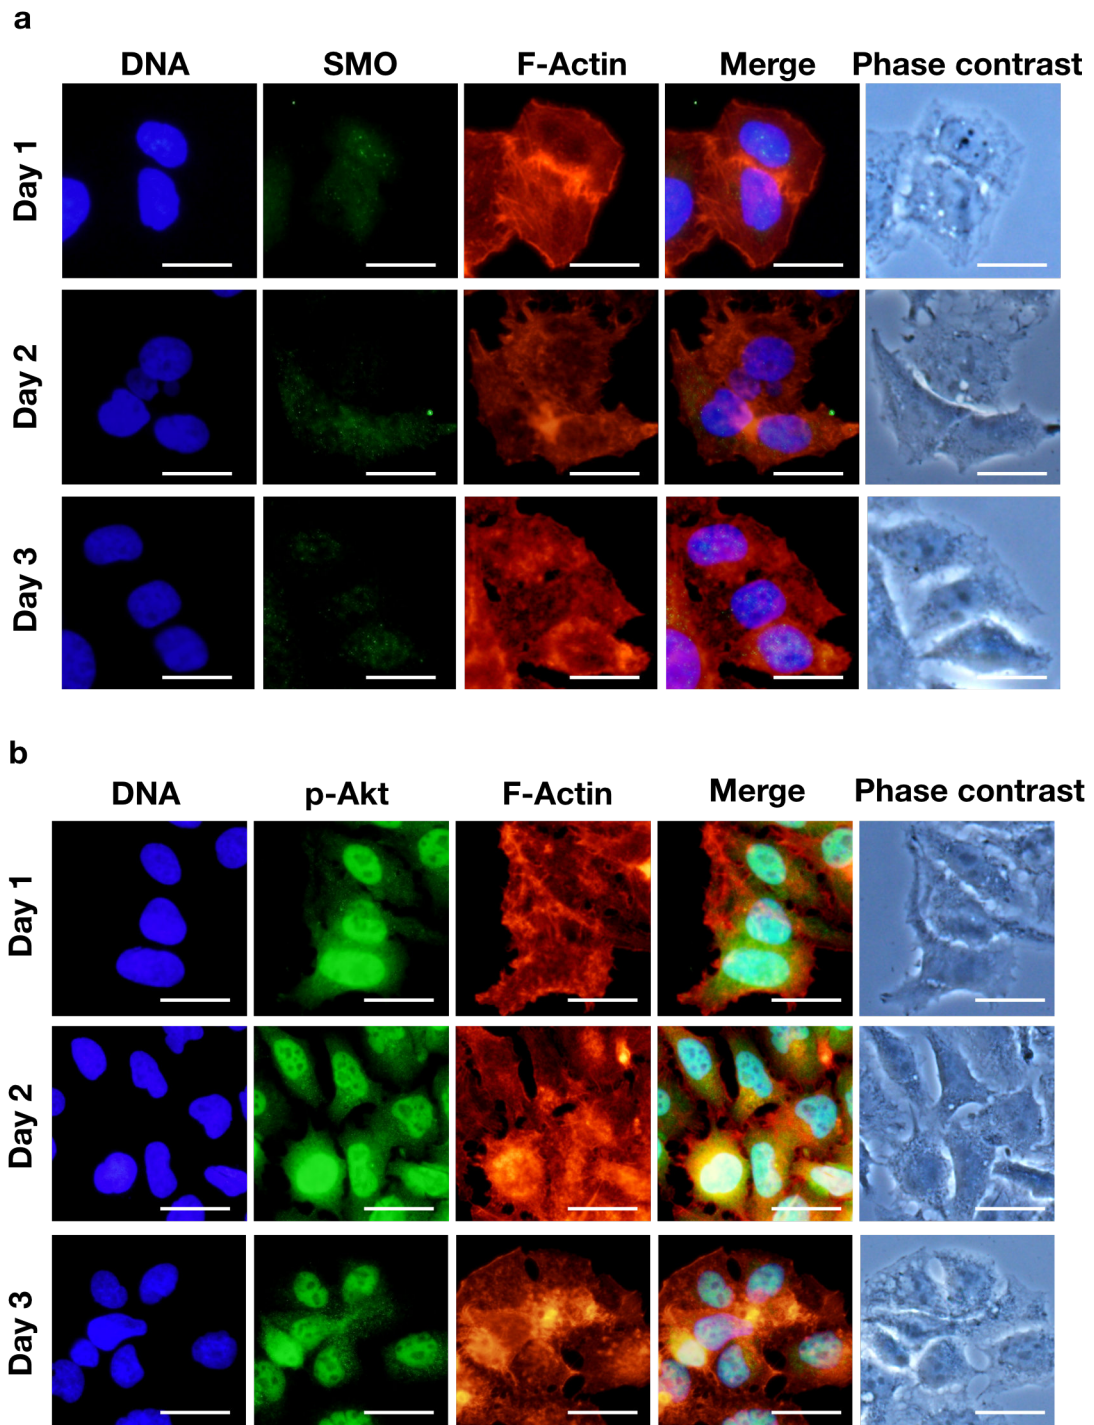

**Supplementary Figure S3.** HepG2 cells transfected with siSMOX were cultured on the cover slip and fixed on day 1, 2 and 3. DNA, SMOX (a), phospho-Akt (p-Akt) (b) and F-actin were stained and observed as described in Materials and methods section. Bar = 30  $\mu$ m.

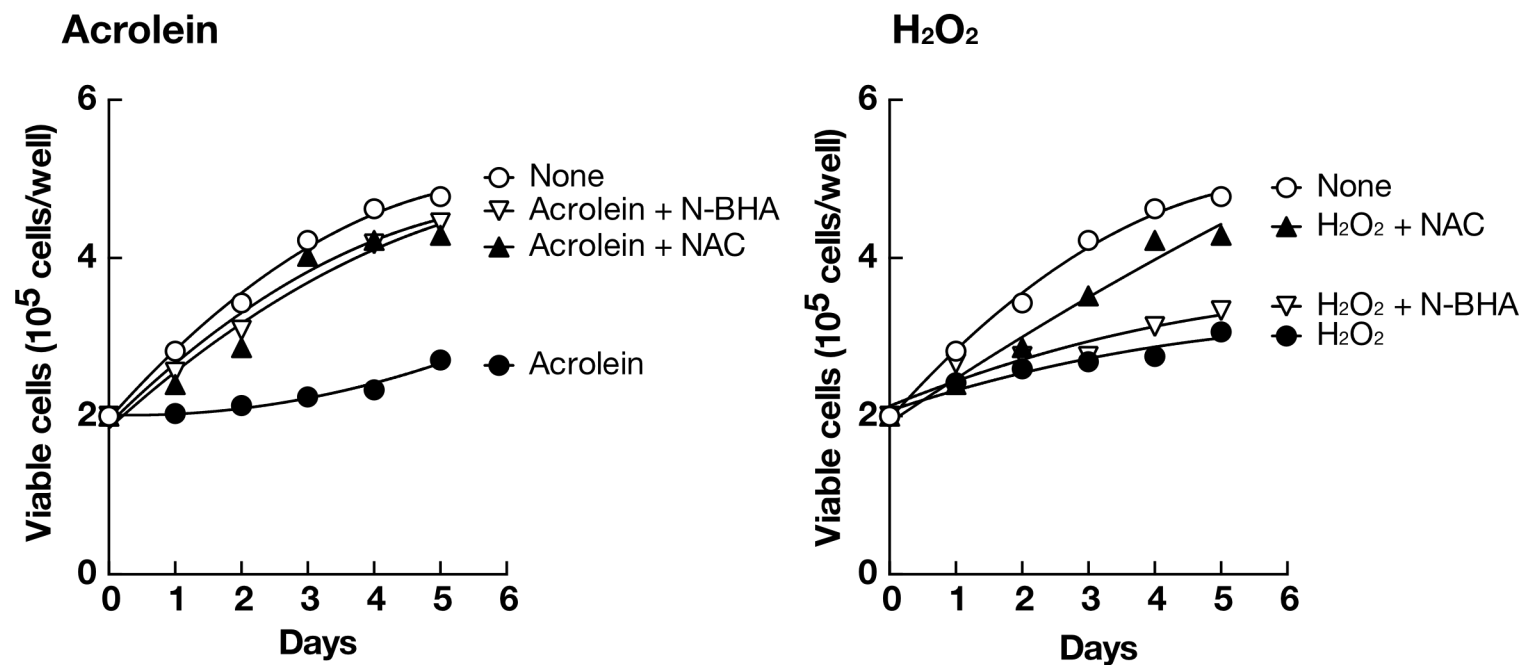

**Supplementary Figure S4.** HepG2 cells were inoculated at  $2 \times 10^5$  cells/well in a 6-well plate (the size of growing area is  $9.6 \text{ cm}^2$  /well) and cultured in the presence of  $20 \mu\text{M}$  acrolein or  $150 \mu\text{M}$   $\text{H}_2\text{O}_2$  with  $1 \text{ mM}$  *N*-acetylcysteine (NAC) or  $1 \text{ mM}$  *N*-benzylhydroxylamine (N-BHA) for 5 days and viable cells were counted. The viable cell number was counted under a microscope in the presence of 0.25% trypan blue.

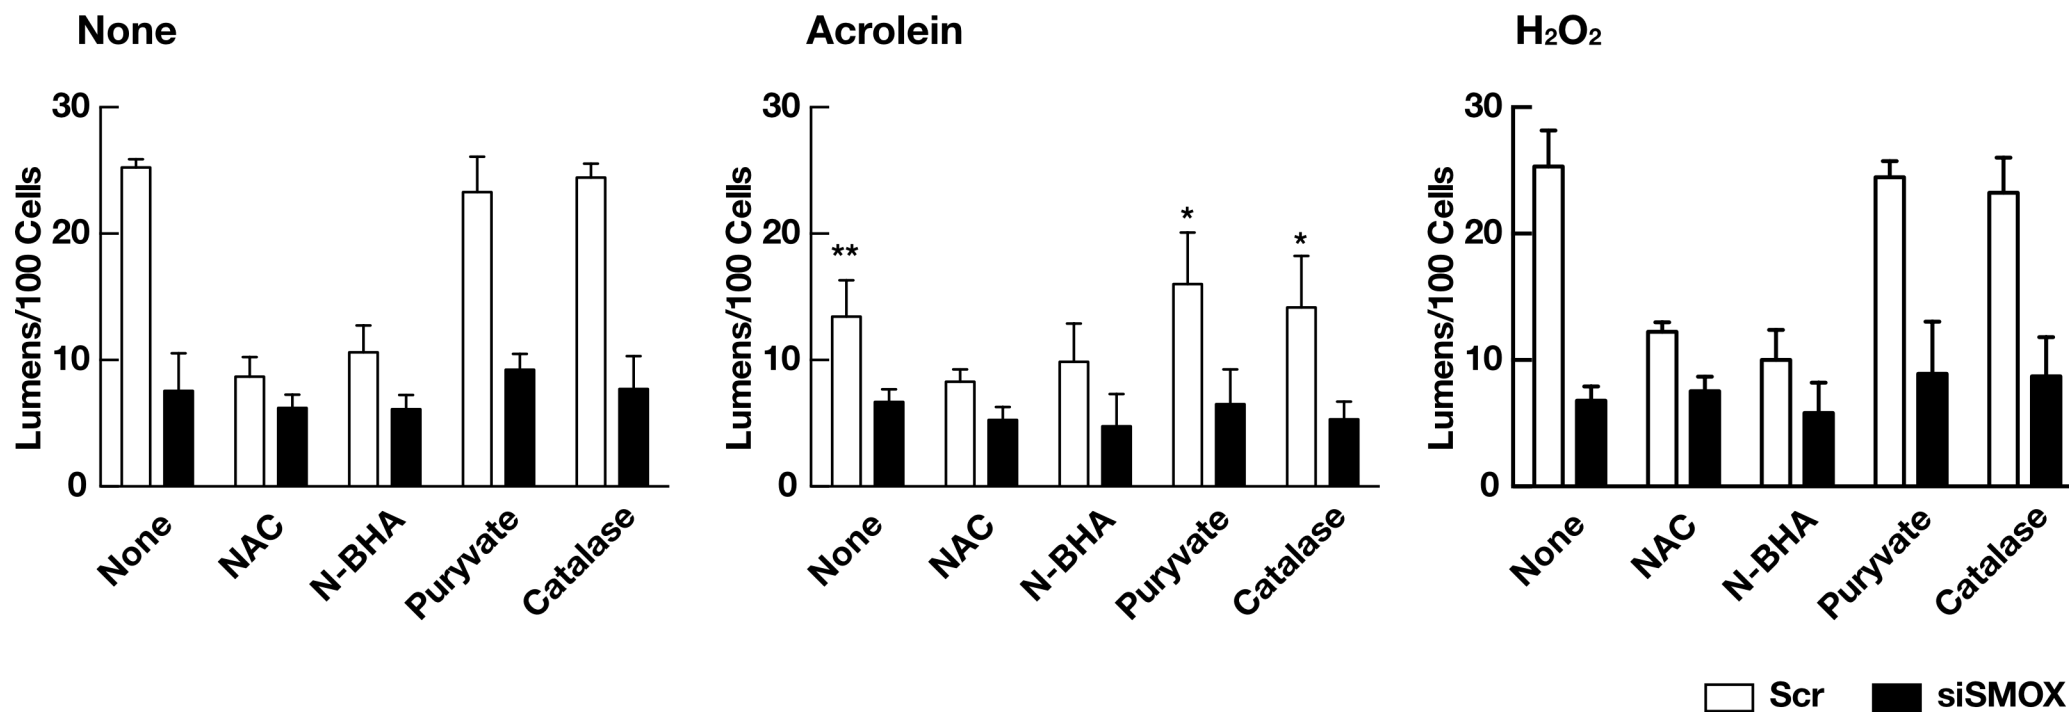

**Supplementary Figure S5.** HepG2 cells transfected with Scr (open column) or siSMOX (filled column) RNAs ( $5 \times 10^5$  cells for each treatment) were treated with 1 mM *N*-acetylcysteine (NAC), 1 mM *N*-benzylhydroxylamine (N-BHA), 4 mM pyruvate or  $10^4$  units/mL catalase for 3 days in the presence of 5  $\mu$ M acrolein or 5  $\mu$ M H<sub>2</sub>O<sub>2</sub>. The number of bile canaliculi lumens were counted and expressed as numbers of lumens/100 cells. Values are expressed as mean + SD of three independent experiments. \*,  $p < 0.05$ , \*\*,  $p < 0.01$  against None.

Fig. 5

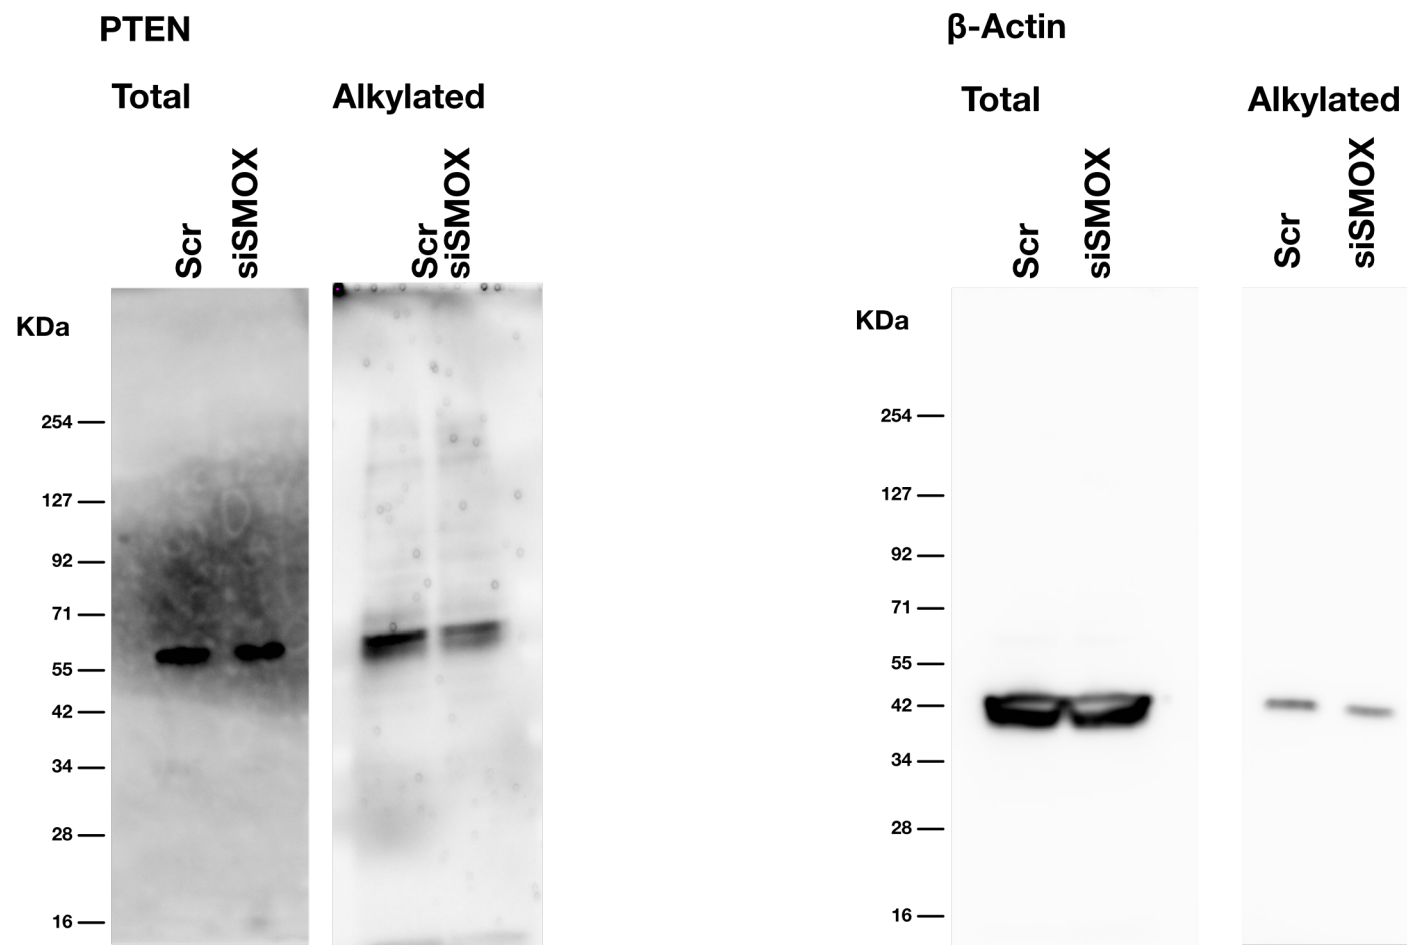

**Supplementary Figure S6.** Full-length blots/gels for Fig. 5 are presented. Three million cells were transfected with Scr and siSMOX RNAs, cultured for 3 days. Alkylated PTEN and  $\beta$ -actin were biotin-tagged and detected as described in Materials and methods section. Total PTEN and  $\beta$ -actin levels were measured by western blot analysis using 40  $\mu$ g of cell extract.
